# Supplementary material for: Multiple Indicators of Undernutrition, Infection, and Inflammation in Lactating Women Are Associated with Maternal Iron Status and Infant Anthropometry in Panama: The MINDI Cohort
Source: MDPI journal article supplement (doi:10.3390/nu14173497), 2022-08-25
Supplement: s1 [file s1]

# Multiple Indicators of Undernutrition, Infection and Inflammation in Lactating Women Are Associated with Maternal Iron Status and Infant Anthropometry in Panama: The MINDI Cohort

Doris González-Fernández, Elizabeta Nemeth, Emérita del Carmen Pons, Odalis Teresa Sinisterra, Delfina Rueda, Lisa Starr, Veena Sangkhae, Enrique Murillo, Marilyn E. Scott and Kristine G. Koski

## Supplementary Material

**Table S1.** Comparison of maternal blood, inflammation, iron and other nutritional indicators by protein status as measured by retinol binding protein (RBP): protein deficient (RBP <30 mg/L) and protein sufficient (RBP ≥30 mg/L). Means ± SD are presented for normally-distributed variables, and medians with interquartile regions for non-normally distributed variables.

|                                                   | RBP <30 mg/L<br>n=36  | RBP ≥30 mg/L<br>n=63  | p             |
|---------------------------------------------------|-----------------------|-----------------------|---------------|
| <b>RBC indices</b>                                |                       |                       |               |
| Hemoglobin (g/L)                                  | 114.8 ± 1.7           | 119.1 ± 1.4           | <b>0.031</b>  |
| Hematocrit (%) <sup>*</sup>                       | 36.9 ± 0.5            | 38.1 ± 0.4            | <b>0.023</b>  |
| Total RBC x10 <sup>6</sup> /mm <sup>3</sup>       | 3.98 ± 0.07           | 4.10 ± 0.04           | 0.07          |
| MCV, fL                                           | 92.9 ± 0.8            | 92.7 ± 0.6            | 0.40          |
| MCH, pg                                           | 28.9 ± 0.3            | 29.1 ± 0.2            | 0.34          |
| MCHC, g/L                                         | 311.3 ± 2.0           | 314.2 ± 1.3           | 0.11          |
| RDW-CV, %                                         | 14.0 ± 0.2            | 13.7 ± 0.1            | 0.14          |
| <b>WBC indices x10<sup>3</sup>/mm<sup>3</sup></b> |                       |                       |               |
| Total WBC                                         | 8.9 ± 3.4             | 7.8 ± 2.1             | <b>0.004</b>  |
| Neutrophils                                       | 4.8 (3.7 – 6.7)       | 4.0 (3.4 – 5.0)       | 0.039         |
| Lymphocytes                                       | 2.5 ± 1.0             | 2.4 ± 8.1             | 0.21          |
| Monocytes                                         | 0.40 (0.33 – 0.46)    | 0.34 (0.31 – 0.40)    | 0.016         |
| Eosinophils                                       | 0.63 (0.36 – 0.91)    | 0.59 (0.33 – 0.91)    | 0.70          |
| Basophils                                         | 0.05 (0.03 – 0.06)    | 0.04 (0.03 – 0.06)    | 0.58          |
| <b>Iron indicators</b>                            |                       |                       |               |
| Ferritin, µg/L                                    | 23.0 (13.6 – 34.2)    | 24.2 (13.9 – 37.6)    | 0.68          |
| sTfR, mg/L                                        | 8.59 (6.62 – 10.76)   | 7.51 (5.87 – 9.37)    | 0.14          |
| Serum iron, µmol/L                                | 9.88 (6.77 – 12.0)    | 10.44 (7.45 – 14.34)  | 0.31          |
| Hepcidin, µg/L                                    | 15.4 (12.0 – 21.1)    | 15.7 (11.3 – 20.6)    | 0.96          |
| <b>Inflammation indicators</b>                    |                       |                       |               |
| CRP, mg/L                                         | 1.30 (0.50 – 2.75)    | 1.40 (0.50 – 4.10)    | 0.66          |
| NLR                                               | 1.90 (1.55 – 2.48)    | 1.75 (1.32 – 2.31)    | 0.29          |
| <b>Cytokines (pg/mL)</b>                          |                       |                       |               |
| IL-1β                                             | 1.01 (0.02 – 2.04)    | 0.02 (0.02 – 0.99)    | 0.17          |
| IL-4                                              | 2.44 (0.24 – 3.80)    | 2.06 (0.24 – 5.25)    | 0.70          |
| IL-6, median (min-max)                            | 1.60 (1.60 – 88.9)    | 1.60 (1.60 – 51.90)   | 0.67          |
| IL-10                                             | 0.32 (0.13 – 2.00)    | 0.32 (0.07 – 1.11)    | 0.23          |
| IL-12                                             | 1.57 (0.37 – 5.49)    | 0.88 (0.06 – 6.11)    | 0.56          |
| IL-13                                             | 0.78 (0.28 – 0.93)    | 0.93 (0.93 – 1.60)    | <b>0.0001</b> |
| IL-17                                             | 0.79 (0.56 – 1.81)    | 0.93 (0.47 – 1.70)    | 0.77          |
| TNF-α                                             | 5.17 (0.50 – 11.02)   | 4.38 (2.69 – 7.74)    | 0.70          |
| IFN-γ                                             | 1.80 (0.69 – 3.72)    | 1.41 (0.05 – 3.48)    | 0.29          |
| MCP-1                                             | 322.3 (285.6 – 429.1) | 314.2 (238.0 – 388.2) | 0.61          |
| <b>Nutritional indicators</b>                     |                       |                       |               |

|                                  |                       |                       |               |
|----------------------------------|-----------------------|-----------------------|---------------|
| Retinol/RBP ratio                | 1.27 (1.06 – 2.14)    | 0.59 (0.37 – 0.86)    | <b>0.0001</b> |
| Folic acid, nmol/L               | 11.2 (8.3 – 14.1)     | 12.4 (10.1 – 16.5)    | 0.07          |
| Vitamin B <sub>12</sub> , pmol/L | 151.5 (121.0 – 195.5) | 153.0 (129.0 – 187.0) | 0.99          |
| Vitamin A, µmol/L                | 1.39 (1.20 – 1.56)    | 1.41 (1.12 – 1.88)    | 0.45          |
| IGF-1, ng/mL                     | 28.8 (25.6 – 34.3)    | 31.8 (27.6 – 34.6)    | 0.34          |

\*One influential observation was removed. P values<0.05 are in bold.

Abbreviations: CRP, C-reactive protein; IGF-1, insulin-like growth factor; IL, interleukin; MCH, mean corpuscular hemoglobin; MCHC, mean corpuscular hemoglobin concentration; MCP-1, monocyte chemoattractant protein-1; MCV, mean corpuscular volume; NLR, neutrophil-lymphocyte ratio; RBC, red blood cells; RBP, retinol-binding protein; RDW-CV: red cell deviation width - coefficient of variation; SD, standard deviation; sTfR, serum transferrin receptor; WBC, white blood cells.

**Table S2.** MFP linear regression model for log-platelet counts.

| Log-platelets <sup>1</sup>  | Coef ± SE     | 95% CI         | β     | p-value | Ranking                     | Standardized dominance |
|-----------------------------|---------------|----------------|-------|---------|-----------------------------|------------------------|
| t- CRP, mg/L                | 0.02 ± 0.007  | 0.01, 0.04     | 0.30  | 0.001   | 1                           | 0.283                  |
| t- Weeks post-partum        | -0.01 ± 0.003 | -0.02, -0.005  | -0.29 | <0.0001 | 2                           | 0.234                  |
| t- Cups of coffee/d         | 0.07 ± 0.02   | 0.03, 0.11     | 0.29  | <0.0001 | 3                           | 0.165                  |
| t- Serum iron, µmol/L       | -0.01 ± 0.005 | -0.02, -0.0002 | -0.17 | 0.044   | 4                           | 0.103                  |
| t- Scabies, presence        | 0.17 ± 0.08   | 0.01, 0.33     | 0.17  | 0.037   | 5                           | 0.078                  |
| t- Bacteriuria, presence    | -0.18 ± 0.07  | -0.32, -0.04   | -0.20 | 0.011   | 6                           | 0.077                  |
| t- Urinary specific gravity | 0.01 ± 0.003  | 0.002, 0.02    | 0.21  | 0.008   | 7                           | 0.060                  |
| Constant                    | 5.74 ± 0.02   | 5.69, 5.79     |       | <0.0001 | Overall fit statistic=0.499 |                        |

<sup>1</sup> Log platelets model (n=94, p<0.0001, adj. R<sup>2</sup>=0.46, VIF=1.11, condition number=1.83). Variables with ≥500 bootstrap repetitions excluded by MFP process: fieldwork, exclusive breastfeeding, hematocrit, monocytes, hemoglobin, IL-17 square root, vitamin B<sub>12</sub>.

Transformation of covariates:.

t- Weeks post-partum = weeks post-partum – 11.67021277.

t- Cups of coffee/d = cups of coffee/d – 2.138297872.

t- C-reactive protein (CRP) = CRP – 2.97765958.

t- Urinary specific gravity = urinary specific gravity – 1017.87234.

t- Serum iron = serum iron – 10.69734034.

**Table S3.** Spearman correlation matrix for weeks post-partum and (A) iron status indicators, (B) serum nutritional indicators, (C) inflammation biomarkers.

| A.                 |   | Weeks post-partum | Hemoglobin, g/L | Hematocrit, % | Ferritin, µg/L | Serum iron, µmol/L | sTfR, mg/L | Hepcidin, µg/L |
|--------------------|---|-------------------|-----------------|---------------|----------------|--------------------|------------|----------------|
| Weeks post-partum  |   | 1                 |                 |               |                |                    |            |                |
| Hemoglobin, g/L    | r | 0.2825            | 1               |               |                |                    |            |                |
|                    | p | 0.0046            |                 |               |                |                    |            |                |
| Hematocrit, %      | r | 0.281             | 0.9299          | 1             |                |                    |            |                |
|                    | p | 0.0048            | 0               |               |                |                    |            |                |
| Ferritin, µg/L     | r | -0.0921           | 0.3143          | 0.2721        | 1              |                    |            |                |
|                    | p | 0.3645            | 0.0015          | 0.0064        |                |                    |            |                |
| Serum iron, µmol/L | r | 0.0665            | 0.4352          | 0.3897        | 0.3968         | 1                  |            |                |
|                    | p | 0.5134            | 0               | 0.0001        | 0              |                    |            |                |

|                      |   |                   |         |                    |         |                      |                   |           |               |        |       |       |       |
|----------------------|---|-------------------|---------|--------------------|---------|----------------------|-------------------|-----------|---------------|--------|-------|-------|-------|
|                      |   |                   |         |                    |         |                      |                   |           |               |        |       |       |       |
|                      |   |                   |         |                    |         |                      |                   |           |               |        |       |       |       |
| sTfR, mg/L           | r | -0.0071           | -0.0474 | 0.0287             | -0.2864 | -0.2301              | 1                 |           |               |        |       |       |       |
|                      | p | 0.9446            | 0.641   | 0.7783             | 0.0041  | 0.0219               |                   |           |               |        |       |       |       |
| Hepcidin, µg/L       | r | -0.1185           | 0.2733  | 0.2571             | 0.6436  | 0.3178               | -0.1552           | 1         |               |        |       |       |       |
|                      | p | 0.2425            | 0.0062  | 0.0102             | 0       | 0.0013               | 0.1252            |           |               |        |       |       |       |
|                      |   |                   |         |                    |         |                      |                   |           |               |        |       |       |       |
| B.                   |   | Weeks post-partum |         | Folic acid, nmol/L |         | Vitamin B-12, pmol/L | Vitamin A, µmol/L | RBP, mg/L | IGF-1, pmol/L |        |       |       |       |
| Weeks post-partum    |   | 1                 |         |                    |         |                      |                   |           |               |        |       |       |       |
| Folic acid, nmol/L   | r |                   |         |                    |         |                      |                   |           |               |        |       |       |       |
|                      | p | 0.3276            |         | 1                  |         |                      |                   |           |               |        |       |       |       |
| Vitamin B-12, pmol/L | r |                   |         |                    |         |                      |                   |           |               |        |       |       |       |
|                      | p | -0.159            |         | -0.077             | 1       |                      |                   |           |               |        |       |       |       |
| Vitamin A, µmol/L    | r |                   |         |                    |         |                      |                   |           |               |        |       |       |       |
|                      | p | -0.0141           |         | 0.2144             | -0.1096 | 1                    |                   |           |               |        |       |       |       |
| RBP, mg/L            | r | 0.1067            |         | 0.1519             | 0.0051  | 0.0523               | 1                 |           |               |        |       |       |       |
|                      | p | 0.3061            |         | 0.1439             | 0.9612  | 0.6167               |                   |           |               |        |       |       |       |
| IGF-1, pmol/L        | r | 0.0103            |         | 0.0067             | 0.0829  | 0.0626               | -0.0483           | 1         |               |        |       |       |       |
|                      | p | 0.9215            |         | 0.9488             | 0.427   | 0.5488               | 0.6439            |           |               |        |       |       |       |
|                      |   | Week              |         |                    |         |                      |                   |           |               |        |       |       |       |
|                      |   | s PP              | CRP     | IL-1β              | IL4     | IL6                  | IL10              | IL12      | IL13          | IL17   | IFN-γ | TNF-α | MCP-1 |
| Weeks PP             |   | 1                 |         |                    |         |                      |                   |           |               |        |       |       |       |
| CRP                  | r | -0.275            | 1       |                    |         |                      |                   |           |               |        |       |       |       |
|                      | p | 0.006             |         |                    |         |                      |                   |           |               |        |       |       |       |
| IL-1β                | r | -0.086            | 0.023   | 1                  |         |                      |                   |           |               |        |       |       |       |
|                      | p | 0.394             | 0.817   |                    |         |                      |                   |           |               |        |       |       |       |
| IL-4                 | r | -0.203            | 0.205   | 0.229              | 1       |                      |                   |           |               |        |       |       |       |
|                      | p | 0.044             | 0.042   | 0.023              |         |                      |                   |           |               |        |       |       |       |
| IL-6                 | r | 0.115             | 0.032   | 0.158              | 0.180   | 1                    |                   |           |               |        |       |       |       |
|                      | p | 0.257             | 0.749   | 0.118              | 0.075   |                      |                   |           |               |        |       |       |       |
| IL-10                | r | -0.214            | -0.033  | 0.333              | 0.185   | 0.095                | 1                 |           |               |        |       |       |       |
|                      | p | 0.033             | 0.742   | 0.001              | 0.067   | 0.352                |                   |           |               |        |       |       |       |
| IL-12                | r | -0.197            | 0.016   | 0.397              | 0.283   | -0.032               | 0.329             | 1         |               |        |       |       |       |
|                      | p | 0.050             | 0.876   | 0                  | 0.004   | 0.753                | 0.001             |           |               |        |       |       |       |
| IL-13                | r | 0.275             | -0.017  | -0.347             | -0.046  | 0.084                | -0.453            | -0.237    | 1             |        |       |       |       |
|                      | p | 0.006             | 0.870   | 0.0004             | 0.653   | 0.410                | 0                 | 0.018     |               |        |       |       |       |
| IL-17                | r | -0.110            | 0.061   | 0.242              | 0.391   | 0.236                | 0.252             | 0.231     | -0.006        | 1      |       |       |       |
|                      | p | 0.279             | 0.551   | 0.016              | 0.0001  | 0.019                | 0.012             | 0.022     | 0.949         |        |       |       |       |
| INF-γ                | r | -0.182            | 0.049   | 0.490              | 0.324   | 0.148                | 0.271             | 0.404     | -0.114        | 0.608  | 1     |       |       |
|                      | p | 0.072             | 0.629   | 0                  | 0.001   | 0.144                | 0.007             | 0         | 0.261         | 0      |       |       |       |
| TNF-α                |   | r                 | 0.037   | 0.069              | 0.184   | 0.305                | 0.387             | 0.164     | 0.155         | -0.046 | 0.210 | 0.215 | 1     |

|              |   |        |        |       |       |        |       |       |        |       |       |       |   |
|--------------|---|--------|--------|-------|-------|--------|-------|-------|--------|-------|-------|-------|---|
|              | p | 0.716  | 0.496  | 0.068 | 0.002 | 0.0001 | 0.104 | 0.125 | 0.647  | 0.037 | 0.033 |       |   |
| <b>MCP-1</b> | r | -0.230 | -0.051 | 0.299 | 0.288 | 0.154  | 0.259 | 0.180 | -0.158 | 0.180 | 0.262 | 0.253 | 1 |
|              | p | 0.022  | 0.615  | 0.003 | 0.004 | 0.128  | 0.010 | 0.075 | 0.118  | 0.076 | 0.009 | 0.012 |   |

PP: post-partum.
